# Supplementary material
Source: publisher figshare collection journal article supplement (https://gsajournals.figshare.com/ndownloader/files/25120655)
Supplement: Supplementary file 1 [file 25120655]

#install frozen version of TIMBR included with manuscript
#install.packages('TIMBR-master.zip', repos = NULL)

#install latest version of TIMBR from GitHub
devtools::install_github("wesleycrouse/TIMBR")
